# Supplementary material for: Beneficial effects of physical exercise and an orally active mGluR2/3 antagonist pro-drug on neurogenesis and behavior in an Alzheimer's amyloidosis model
Source: Frontiers journal article supplement (doi:10.3389/frdem.2023.1198006), 2023-09-06

**Supplemental Figure 1.** Variance partitioning results. **a** Violin plot of all genes. **b** Variation plot of top 50 genes.

**a.**

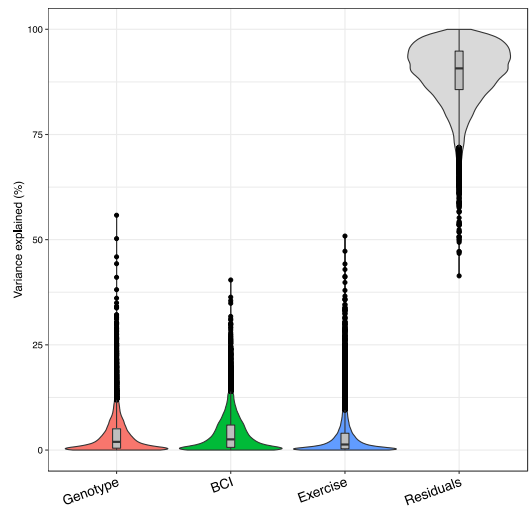

**b.**

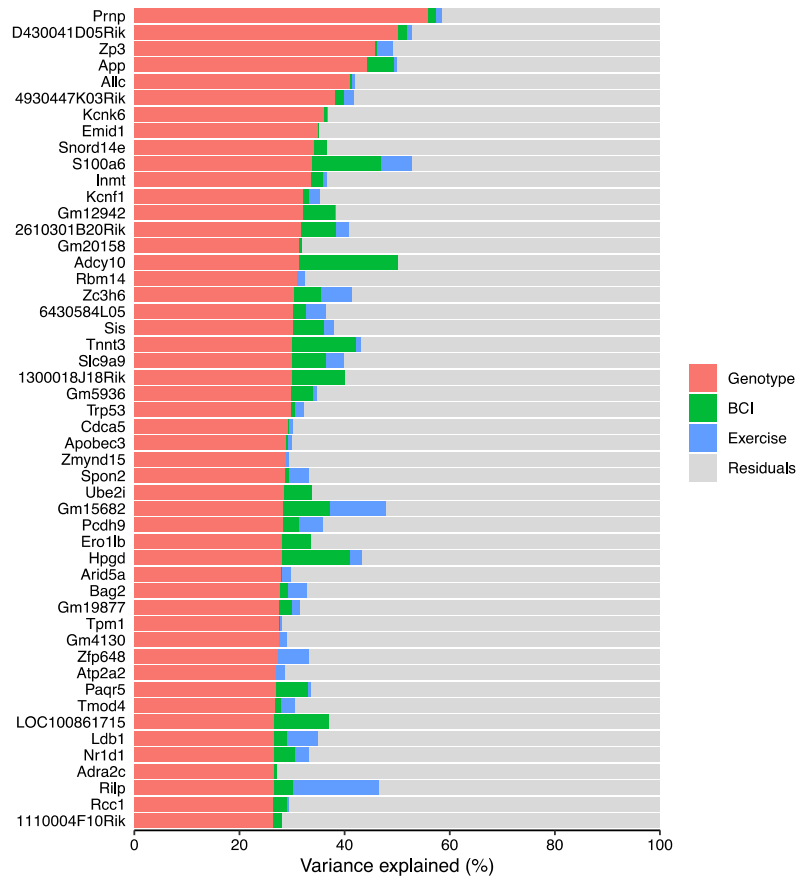

Supplement: Image_1.PDF [file Image_1.PDF]
