# Supplementary material for: Beneficial effects of physical exercise and an orally active mGluR2/3 antagonist pro-drug on neurogenesis and behavior in an Alzheimer's amyloidosis model
Source: Frontiers journal article supplement (doi:10.3389/frdem.2023.1198006), 2023-09-06
Supplement: Table_1.PDF [file Table_1.PDF]

**Supplementary Table 1. Deferential gene expression results**

| <b>Names of group comparisons in online data set</b> | <b>Names used in the manuscript</b>                                 |
|------------------------------------------------------|---------------------------------------------------------------------|
| BorControl vs WT                                     | APP/PS1 untreated vs Wild type                                      |
| BorBCI vs BorControl                                 | APP/PS1 treated with BCI-838 vs APP/PS1 untreated                   |
| BorPE vs BorControl                                  | APP/PS1 treated with PE vs APP/PS1 untreated                        |
| BorBCI vs BorPE                                      | APP/PS1 treated with BCI-838 vs APP/PS1 treated with PE             |
| BorCombination vs BorControl                         | APP/PS1 treated with BCI-838 and PE vs APP/PS1 untreated            |
| BorCombination vs BorBCI                             | APP/PS1 treated with BCI-838 and PE vs APP/PS1 treated with BCI-838 |
| BorCombination vs BorPE                              | APP/PS1 treated with BCI-838 and PE vs APP/PS1 treated with PE      |
